# Supplementary material
Source: PubMed Central journal article supplement (PMC3586294)

## SUPPLEMENTARY INFORMATION

### Stereochemically Probing the Photo-Favorskii Rearrangement: A Mechanistic Investigation

Richard S. Givens\*, Marina Rubina, Kenneth F. Stensrud

Department of Chemistry, the University of Kansas, Lawrence, KS 66045

Corresponding Author: Richard S. Givens

Email: [givensr@ku.edu](mailto:givensr@ku.edu)

#### Contents

|                                                      |   |
|------------------------------------------------------|---|
| General Information .....                            | 1 |
| HPLC Data .....                                      | 2 |
| <sup>1</sup> H spectrum of 14.....                   | 3 |
| <sup>13</sup> C spectrum of 14.....                  | 4 |
| <sup>1</sup> H spectrum of ( <i>S,R</i> )-12a.....   | 5 |
| <sup>13</sup> C spectrum of ( <i>S,R</i> )-12a ..... | 6 |
| <sup>1</sup> H spectrum of ( <i>R,R</i> )-12b .....  | 7 |
| <sup>13</sup> C spectrum of ( <i>R,R</i> )-12b ..... | 8 |

#### General Information

NMR spectra were recorded on a 400 MHz instrument, equipped with a quadruple-band gradient probe (H/C/P/F QNP) or a 500 MHz with a dual carbon/proton cryoprobe (CPDUL).

<sup>13</sup>C NMR spectra were registered with broad-band decoupling. Chiral HPLC analyses were performed using Chiralcel OD-H column (250 x 4.6 mm, 10% IPA in hexanes).

## HPLC Data

Chiral HPLC chromatogram trace of the authentic sample of racemic acid **9**:

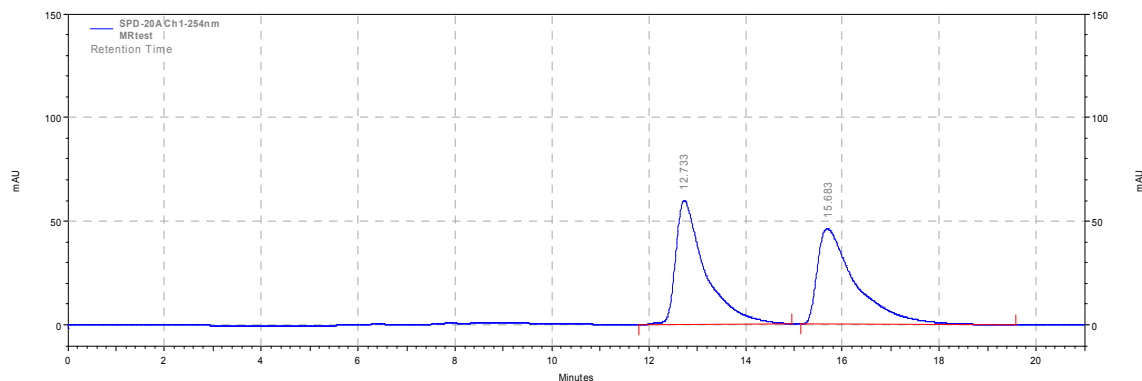

### SPD-20A Ch1-254nm Results

| Retention Time | Area           | Area %        | Height        | Height %      |
|----------------|----------------|---------------|---------------|---------------|
| 12.733         | 2528319        | 50.15         | 59887         | 56.48         |
| 15.683         | 2513244        | 49.85         | 46145         | 43.52         |
| <b>Totals</b>  | <b>5041563</b> | <b>100.00</b> | <b>106032</b> | <b>100.00</b> |

Chiral HPLC chromatogram trace of acid **9** recovered from the photolysis experiment:

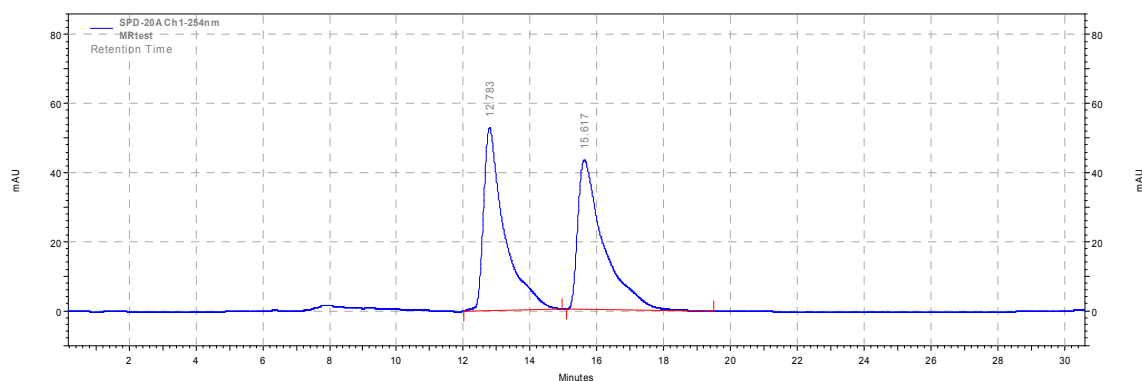

### SPD-20A Ch1-254nm Results

| Retention Time | Area           | Area %        | Height       | Height %      |
|----------------|----------------|---------------|--------------|---------------|
| 12.783         | 2294863        | 49.71         | 52933        | 55.03         |
| 15.617         | 2321444        | 50.29         | 43250        | 44.97         |
| <b>Totals</b>  | <b>4616307</b> | <b>100.00</b> | <b>96183</b> | <b>100.00</b> |

# <sup>1</sup>H spectrum of 14

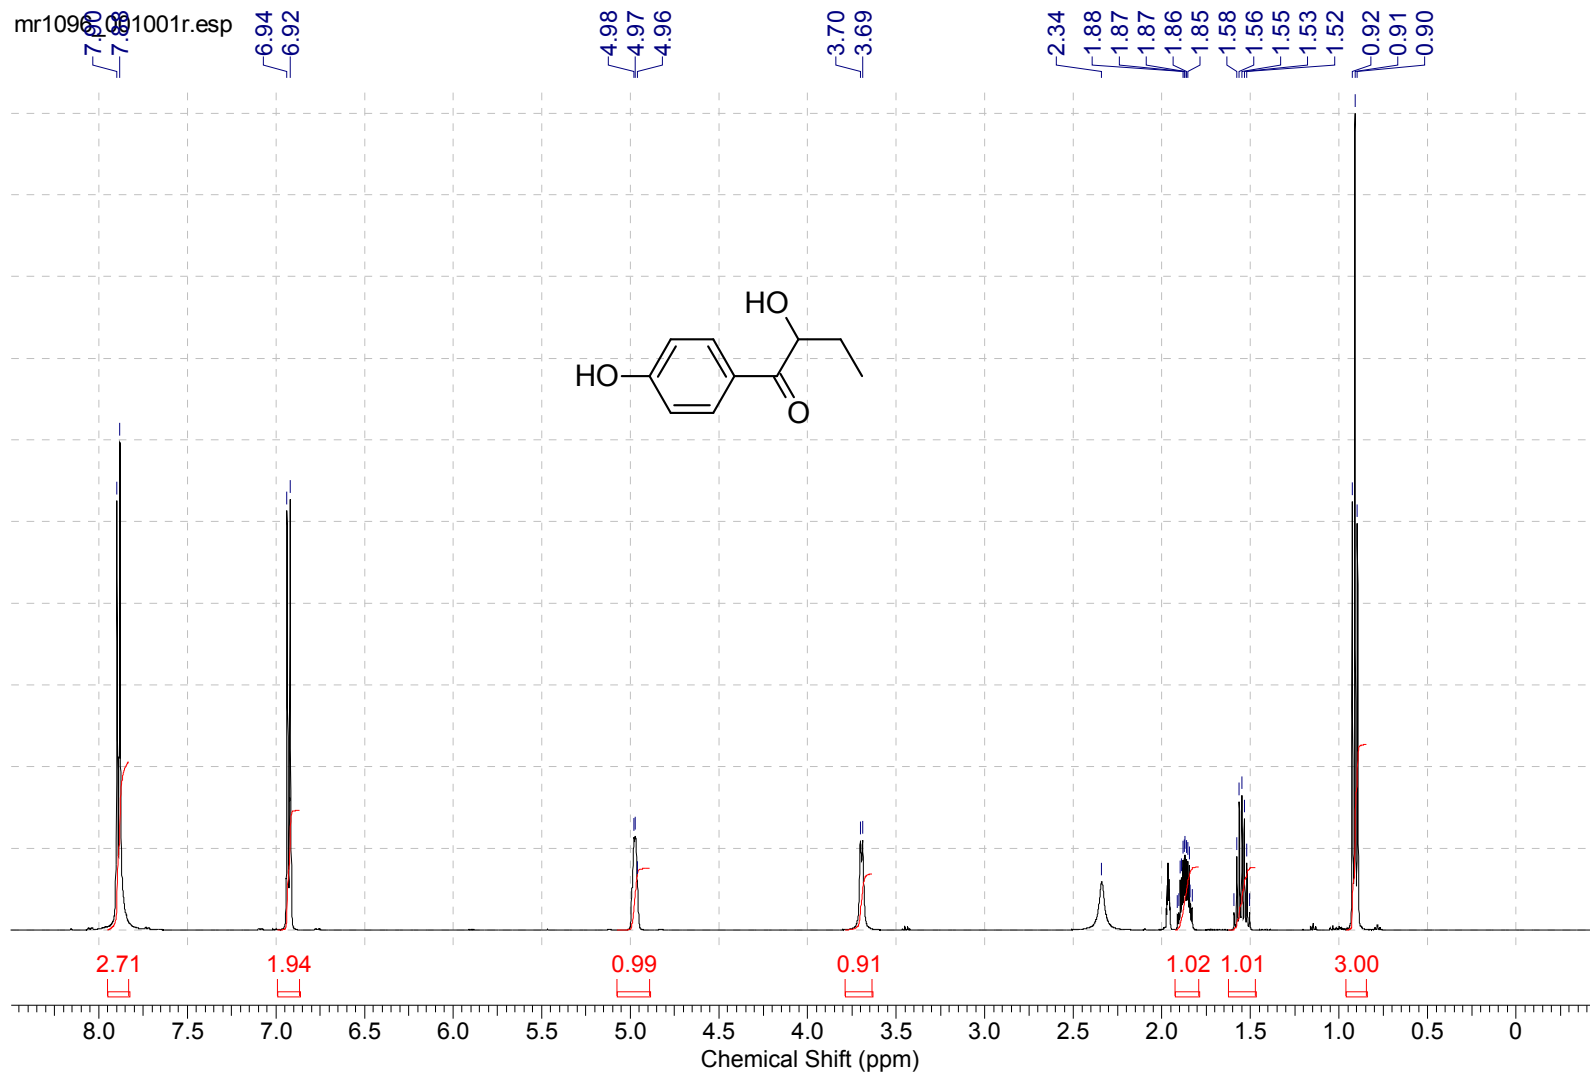

# <sup>13</sup>C spectrum of 14

mr1096\_002001r.es8

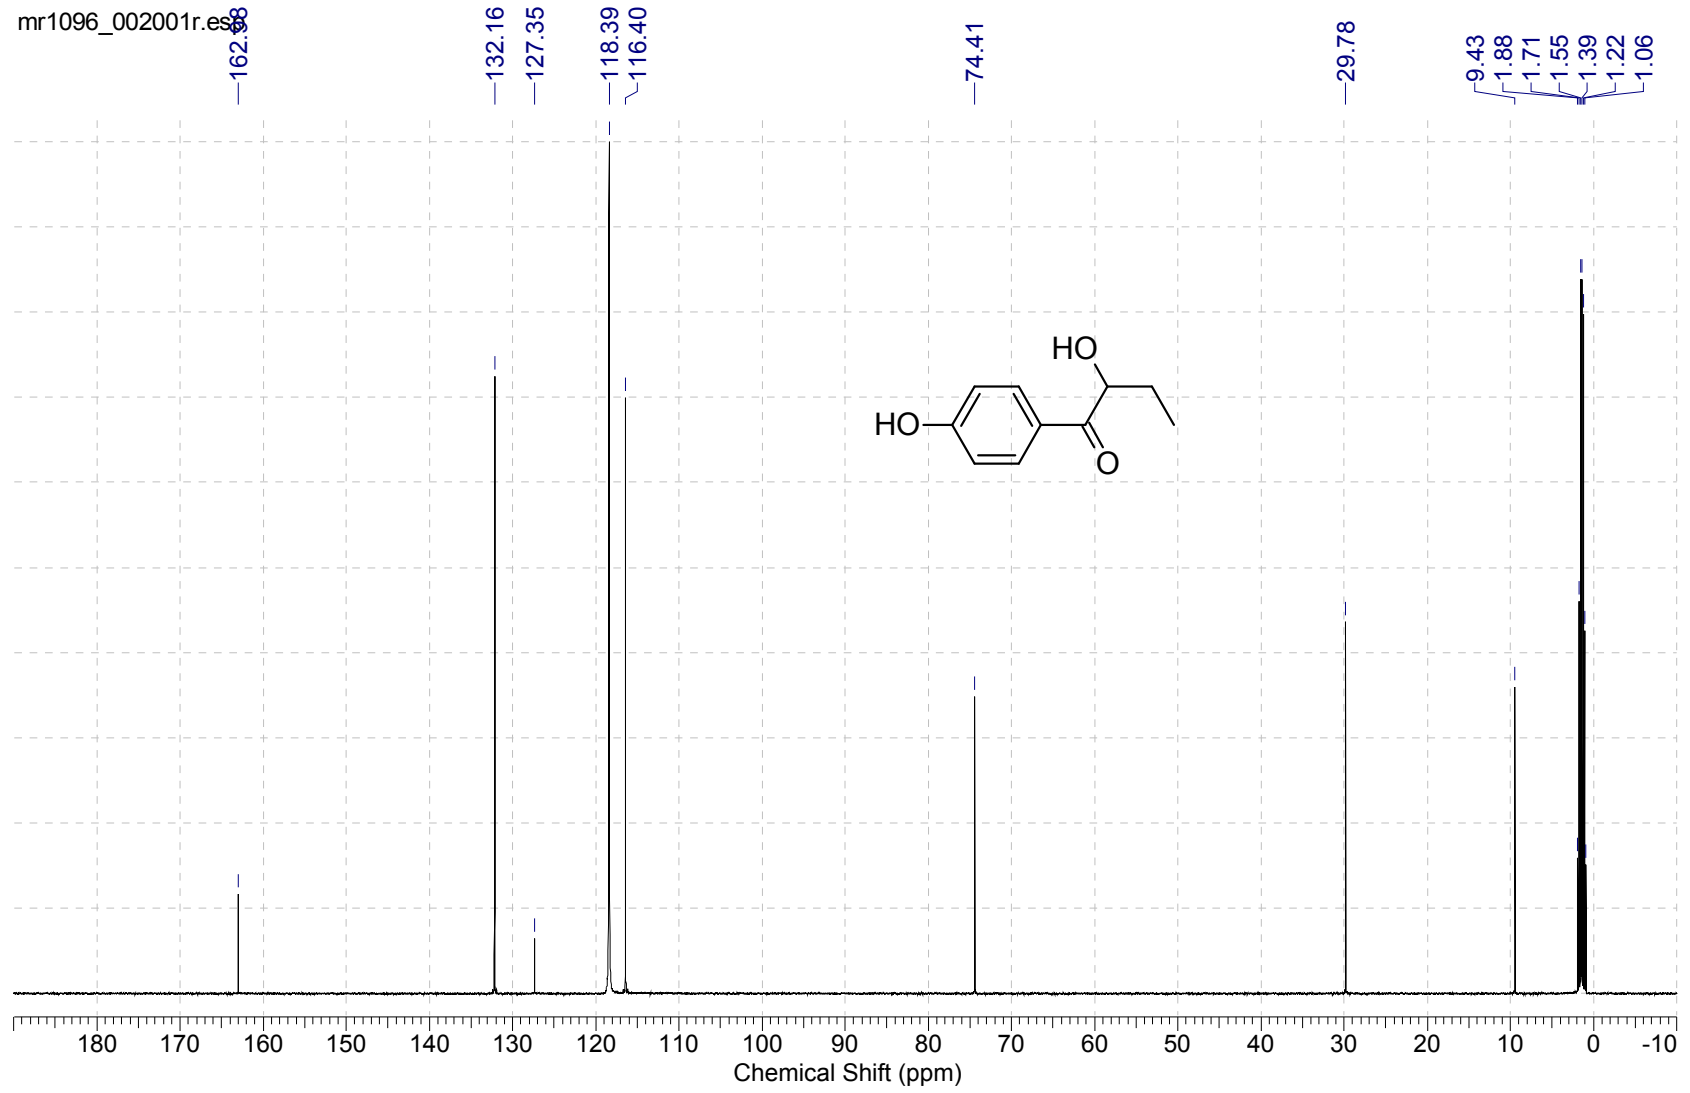

# <sup>1</sup>H spectrum of (S,R)-12a

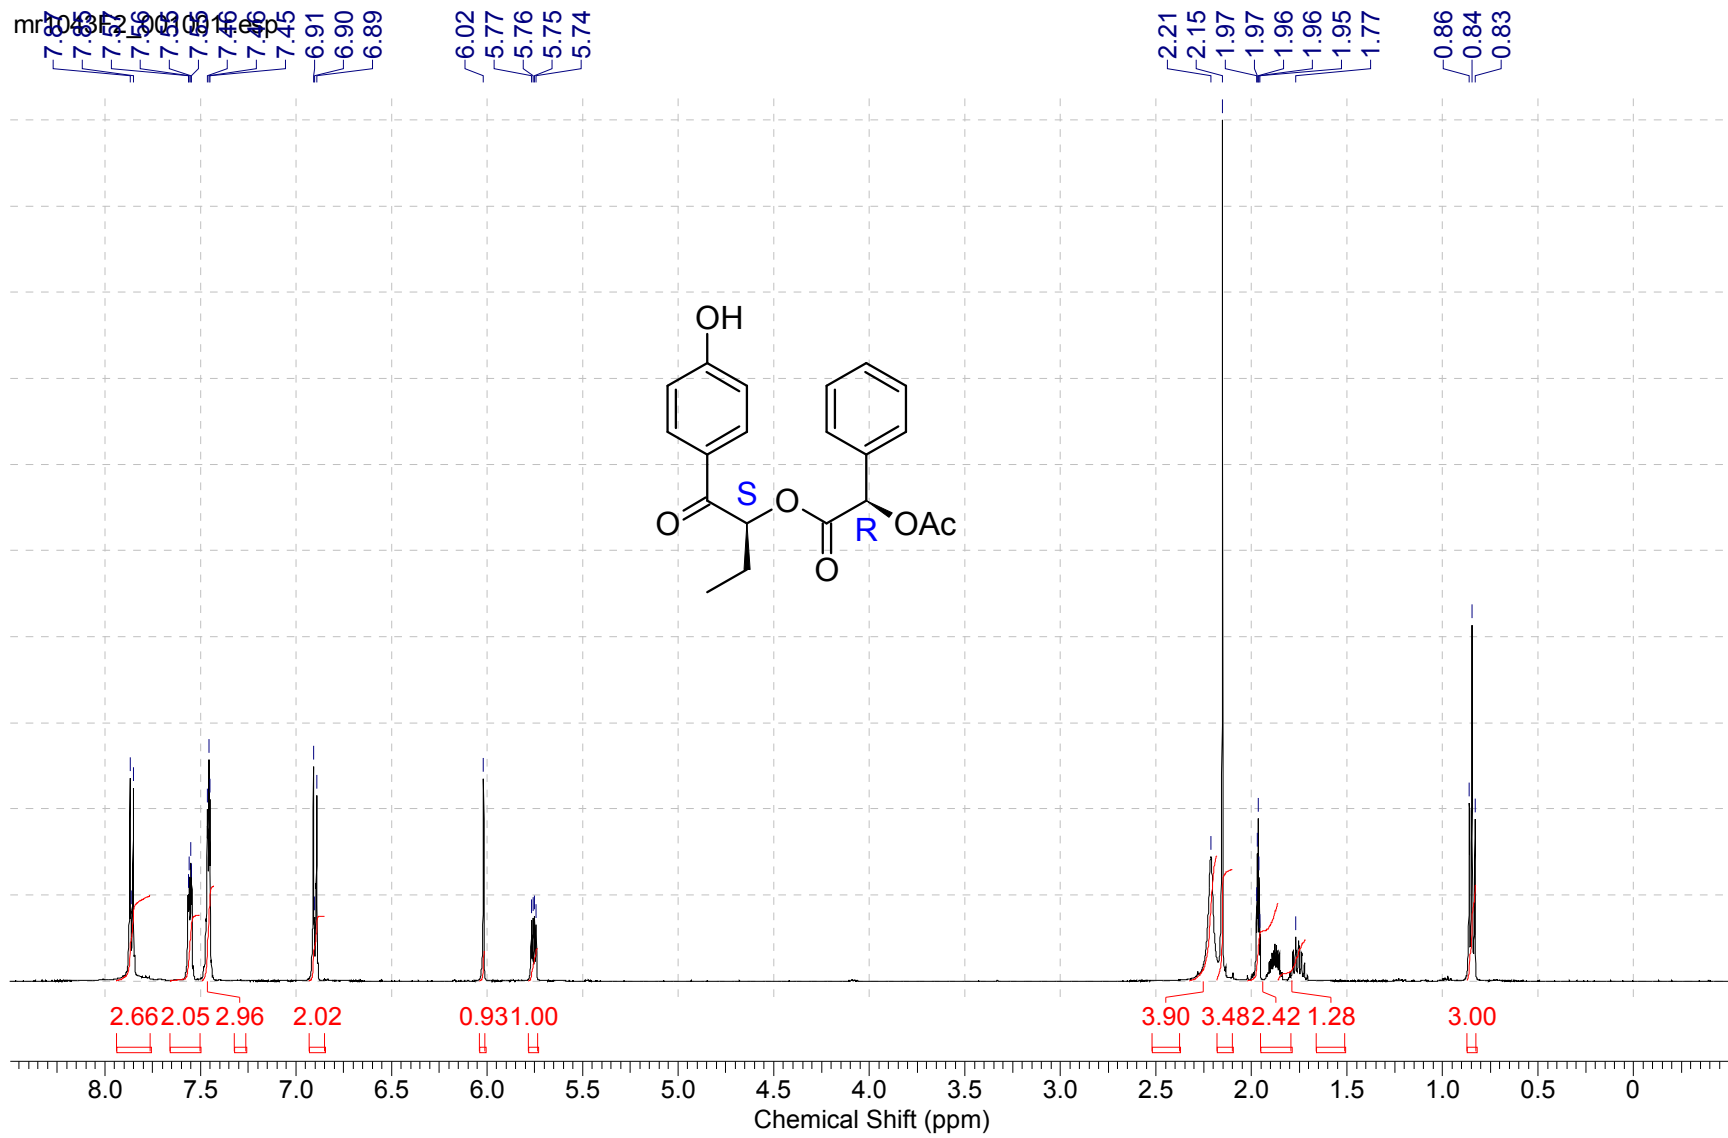

# <sup>13</sup>C spectrum of (S,R)-12a

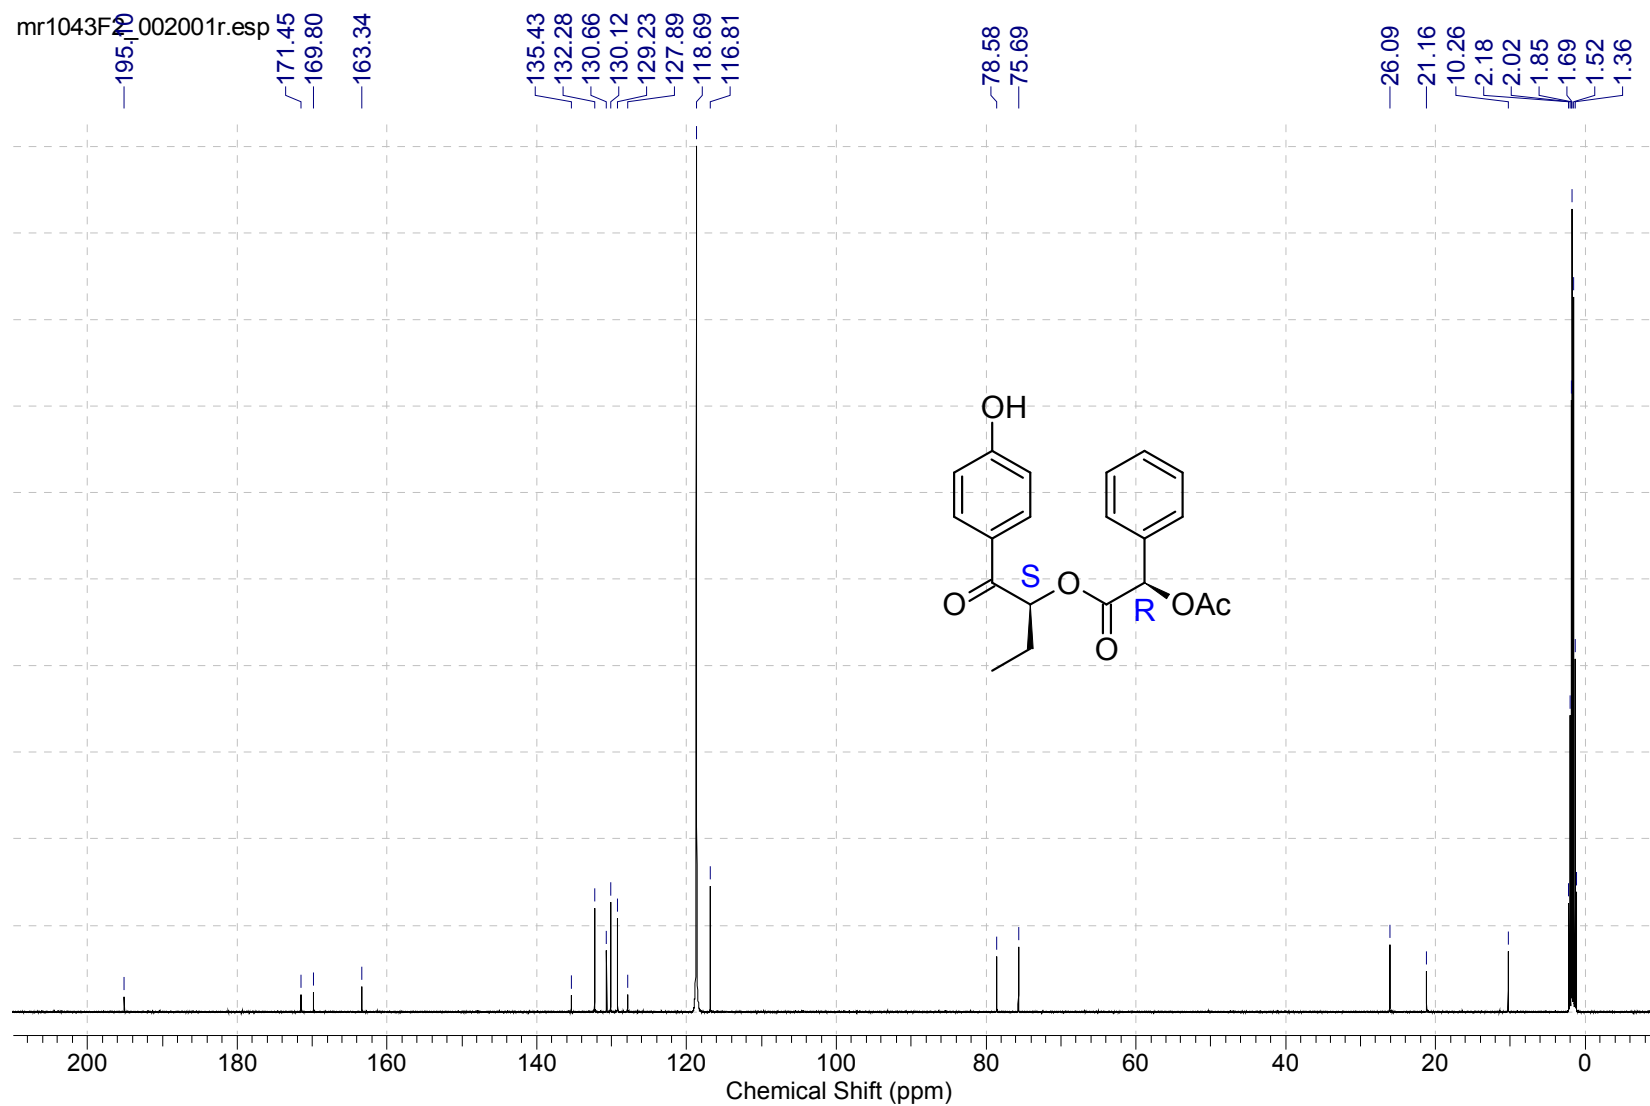

# <sup>1</sup>H spectrum of (R,R)-12b

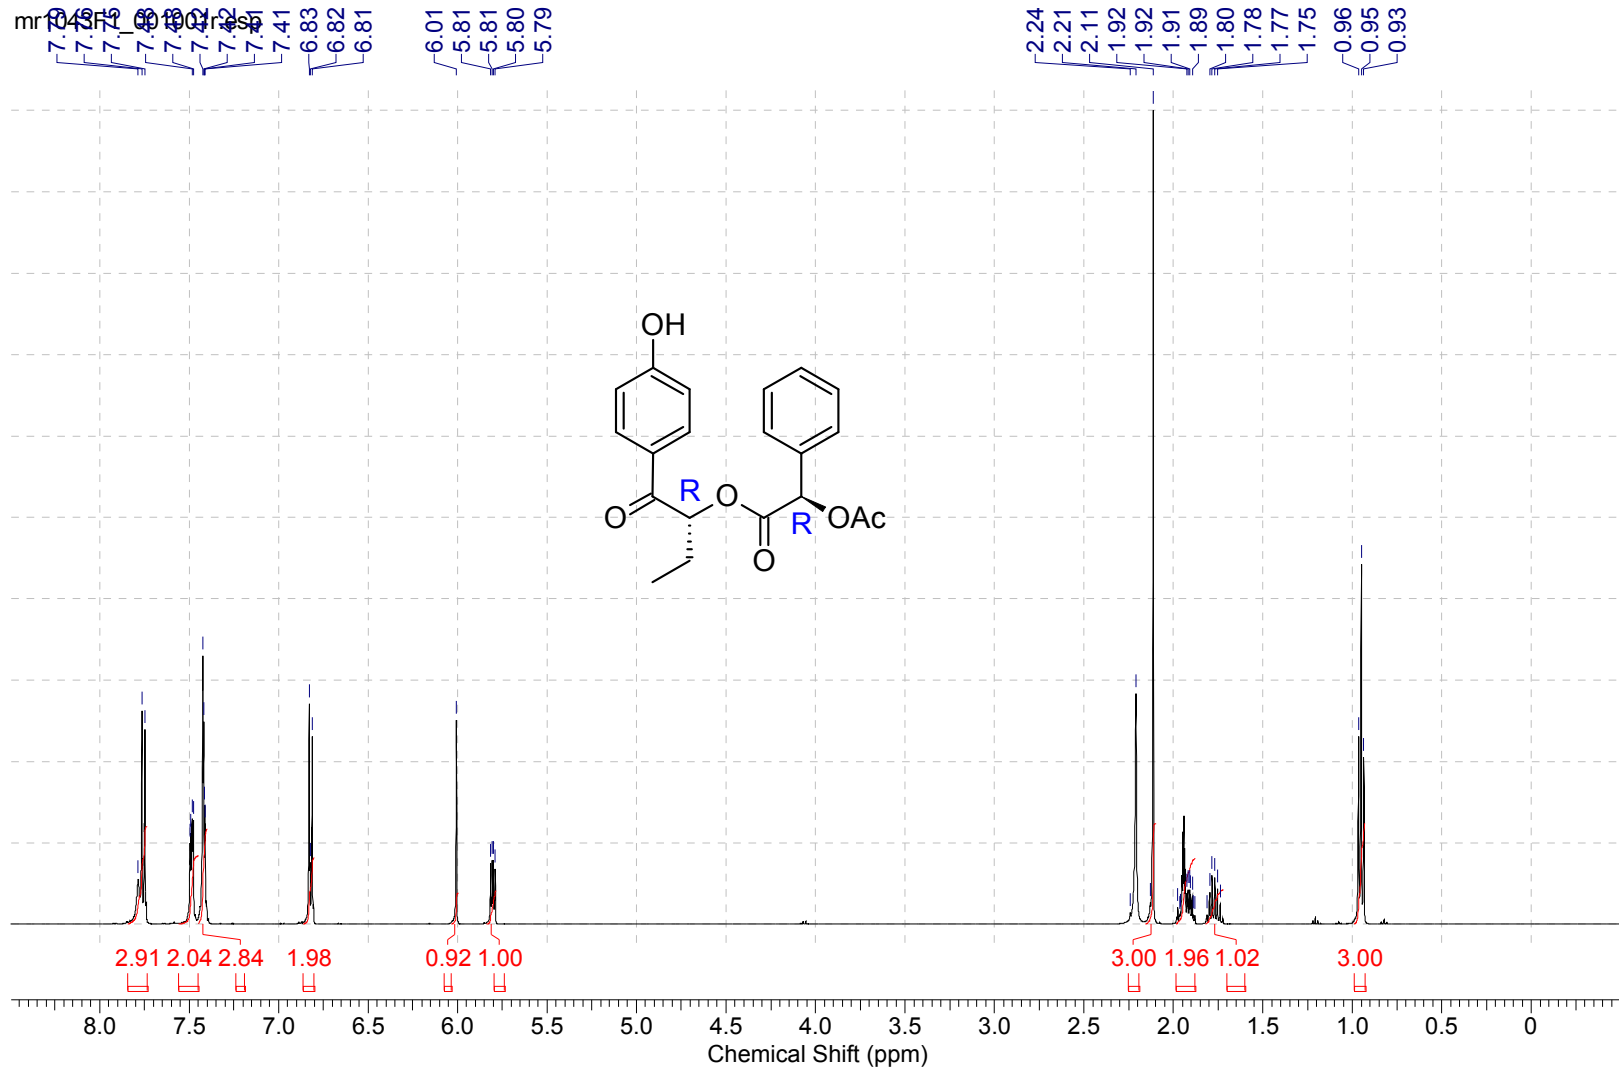

# <sup>13</sup>C spectrum of (R,R)-12b

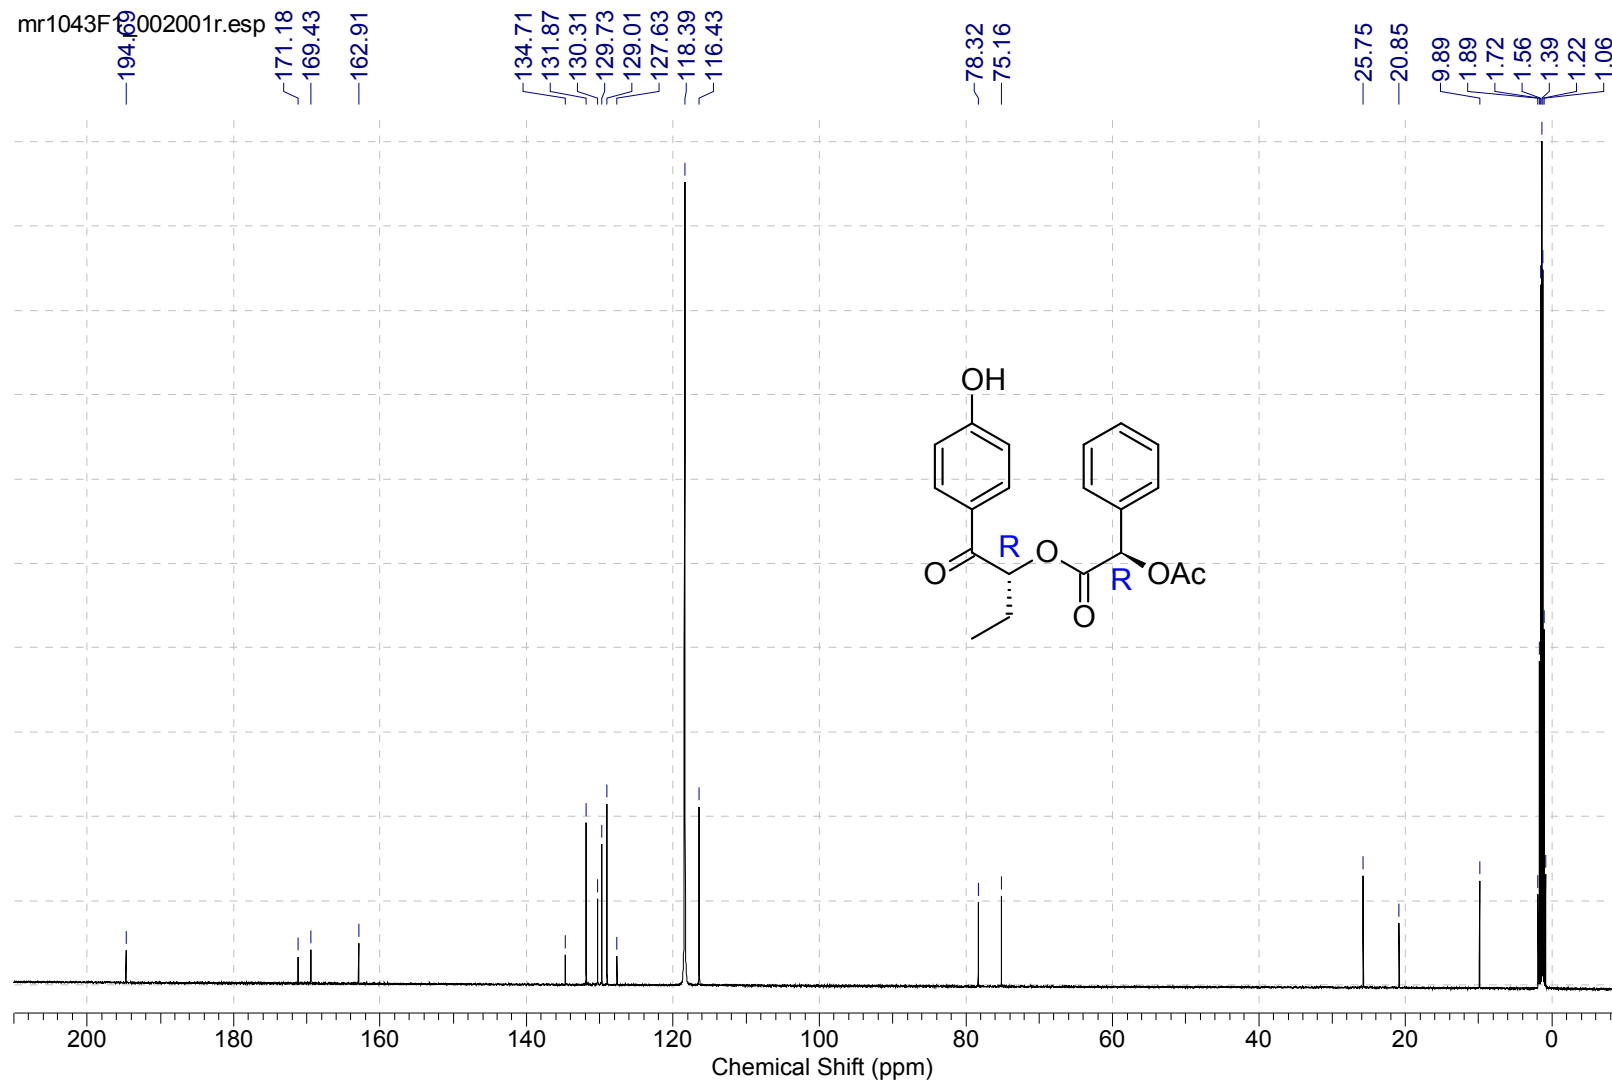

Supplement: NIHMS416323-supplement-1_si_001.pdf [file NIHMS416323-supplement-1_si_001.pdf]
